- sevoflurane exposure to the next generation of male, but not female, rats. *Br J Anaesth* 2018; 121:406–16
42. Gentry KR, Steele LM, Sedensky MM, Morgan PG: Early developmental exposure to volatile anesthetics causes behavioral defects in *Caenorhabditis elegans*. *Anesth Analg* 2013; 116:185–9
  43. Brambrink AM, Evers AS, Avidan MS, Farber NB, Smith DJ, Zhang X, Dissen GA, Creeley CE, Olney JW: Isoflurane-induced neuroapoptosis in the neonatal rhesus macaque brain. *ANESTHESIOLOGY* 2010; 112:834–41
  44. Head BP, Patel HH, Niesman IR, Drummond JC, Roth DM, Patel PM: Inhibition of p75 neurotrophin receptor attenuates isoflurane-mediated neuronal apoptosis in the neonatal central nervous system. *ANESTHESIOLOGY* 2009; 110:813–25
  45. Pearn ML, Hu Y, Niesman IR, Patel HH, Drummond JC, Roth DM, Akassoglou K, Patel PM, Head BP: Propofol neurotoxicity is mediated by p75 neurotrophin receptor activation. *ANESTHESIOLOGY* 2012; 116:352–61
  46. Schilling JM, Kassan A, Mandyam C, Pearn ML, Voong A, Grogman GG, Risbrough VB, Niesman IR, Patel HH, Patel PM, Head BP: Inhibition of p75 neurotrophin receptor does not rescue cognitive impairment in adulthood after isoflurane exposure in neonatal mice. *Br J Anaesth* 2017; 119:465–71

## ANESTHESIOLOGY REFLECTIONS FROM THE WOOD LIBRARY-MUSEUM

### Byline Backstory No. 9: Hanging Sir Humphry—the Davy Oil at Hopkins, Yale, and then the Wood Library-Museum

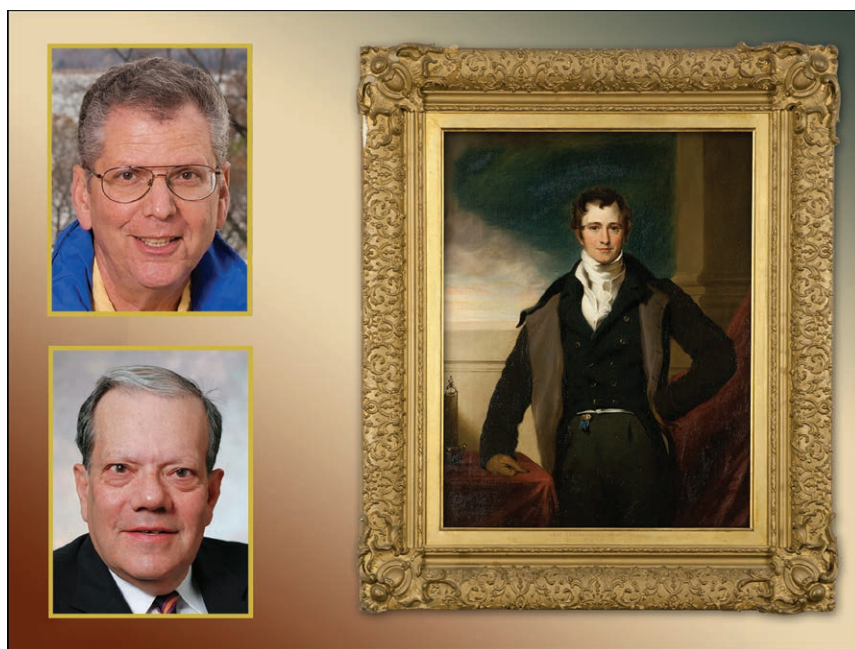

As a Johns Hopkins anesthesiology preceptee, I met a brilliant, plucky pediatric intensivist, Mark C. Rogers, M.D. (*upper left*, image credit: Johns Hopkins Department of Anesthesiology and Critical Care Medicine or ACCM). Named chair of the department he had rebranded “ACCM,” Rogers tapped me to be one of his first interns. After setting up the departmental museum, we drafted the nation’s first geriatric anesthesiology fellowship, a 1984 to 1985 Hopkins–National Institute on Aging collaboration. (Yes, Rogers pioneered innovations for both pediatric and geriatric patients!) Following my move to Connecticut, Yale’s charismatic chair of anesthesiology, Paul G. Barash, M.D. (1942 to 2020, *lower left*) encouraged my geriatric anesthesia lecturing nationwide. After I founded Yale’s departmental museum, Barash blessed my long-distance curating for the Wood Library-Museum of Anesthesiology. So, after hanging at Hopkins and then Yale, my family’s oil portrait of Sir Humphry Davy (*right*) ended up hanging at the Wood Library-Museum before gracing a 2011 cover of *Anesthesiology*. (Copyright © the American Society of Anesthesiologists’ Wood Library-Museum of Anesthesiology, Schaumburg, Illinois.)

*George S. Bause, M.D., M.P.H., Clinical Associate Professor, Case Western Reserve University, Cleveland, Ohio.*
